# Supplementary material for: Core–Shell Structured NiFeSn@NiFe (Oxy)Hydroxide Nanospheres from an Electrochemical Strategy for Electrocatalytic Oxygen Evolution Reaction
Source: PubMed Central journal article supplement (PMC7237859; doi:10.1002/advs.201903777), 2020-03-28
Supplement: ADVS-7-1903777-s001.pdf [file ADVS-7-1903777-s001.pdf]

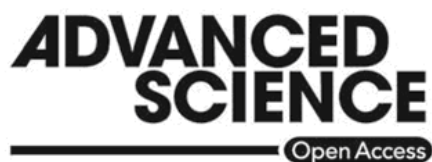

## Supporting Information

for *Adv. Sci.*, DOI: 10.1002/adv.201903777

Core–Shell Structured NiFeSn@NiFe (Oxy)Hydroxide  
Nanospheres from an Electrochemical Strategy for  
Electrocatalytic Oxygen Evolution Reaction

*Mingxing Chen, Shenglin Lu, Xian-Zhu Fu,\* and Jing-Li Luo\**

## Supporting Information

### **Core-Shell Structured NiFeSn@NiFe (oxy)hydroxide Nanospheres from an Electrochemical Strategy for Electrocatalytic Oxygen Evolution Reaction**

*Mingxing Chen, Shenglin Lu, Xian-Zhu Fu,\* Jing-Li Luo\**

Dr. Mingxing Chen, Dr. Shenglin Lu, Prof. Xian-Zhu Fu, Prof. Jing-Li Luo  
College of Materials Science and Engineering, Shenzhen University, Shenzhen 518060, China  
E-mail: ([xz.fu@szu.edu.cn](mailto:xz.fu@szu.edu.cn), [Jingli.Luo@ualberta.ca](mailto:Jingli.Luo@ualberta.ca))

Dr. Mingxing Chen, Dr. Shenglin Lu,  
Key Laboratory of Optoelectronic Devices and Systems of Ministry of Education and Guangdong Province, College of Optoelectronic Engineering, Shenzhen University, Shenzhen 518060, China

Prof. Jing-Li Luo  
Department of Chemical and Materials Engineering, University of Alberta, Edmonton,  
Alberta, T6G 2G6, Canada

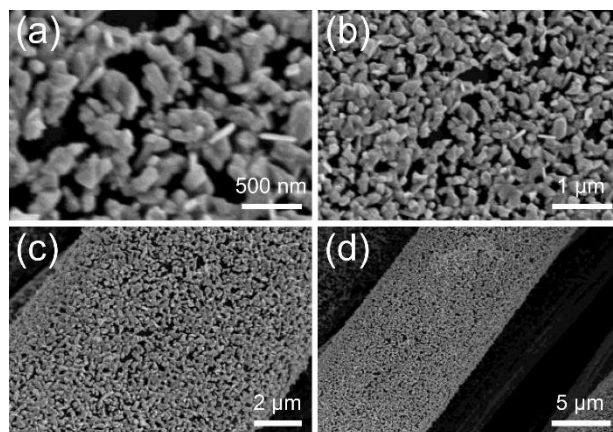

**Figure S1.** SEM images of NiSn.

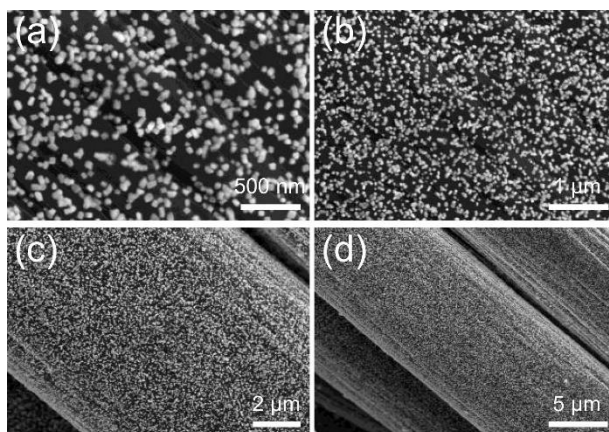

**Figure S2.** SEM images of  $\text{NiFe}_{0.1}\text{Sn}$ .

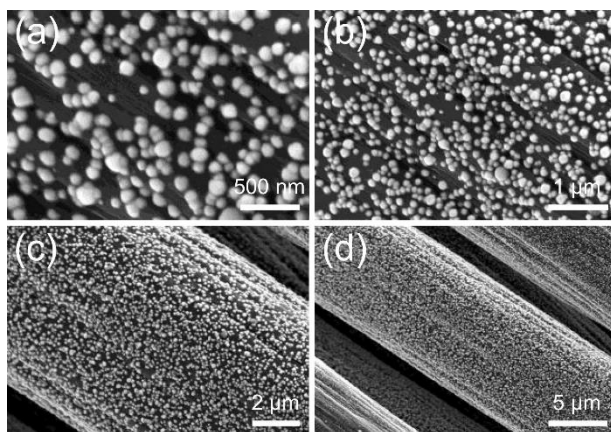

**Figure S3.** SEM images of NiFe<sub>1</sub>Sn.

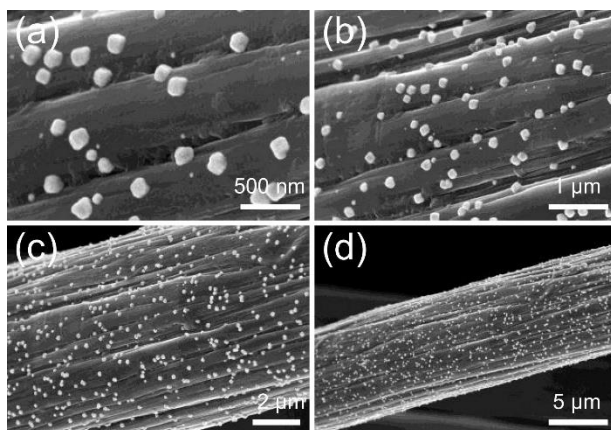

**Figure S4.** SEM images of  $\text{NiFe}_{0.5}$ .

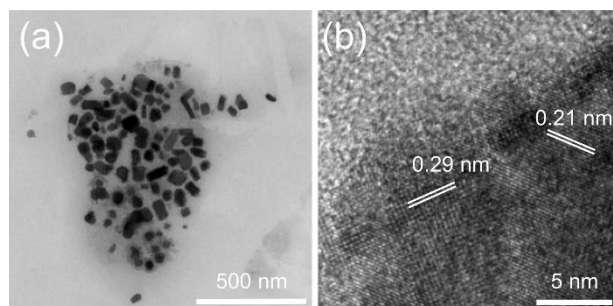

**Figure S5.** (a) TEM and (b) HRTEM images of NiSn.

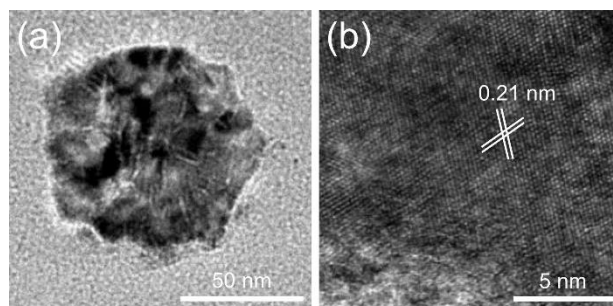

**Figure S6.** (a) TEM and (b) HRTEM images of NiFe<sub>0.5</sub>.



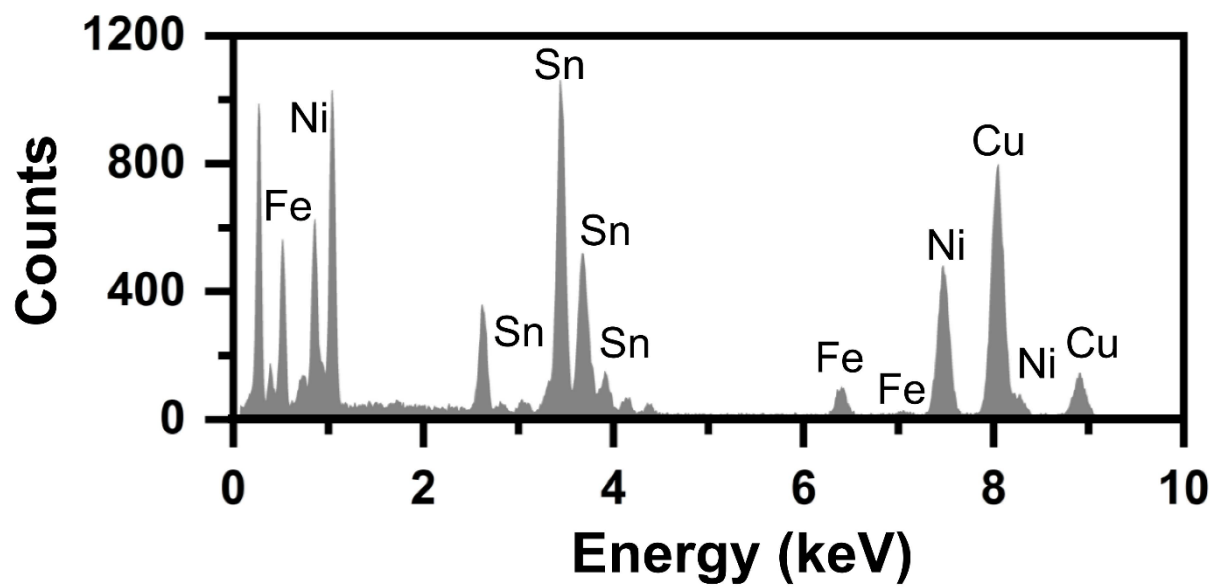

Figure S7. EDX spectrum of  $\text{NiFe}_{0.5}\text{Sn}$ .

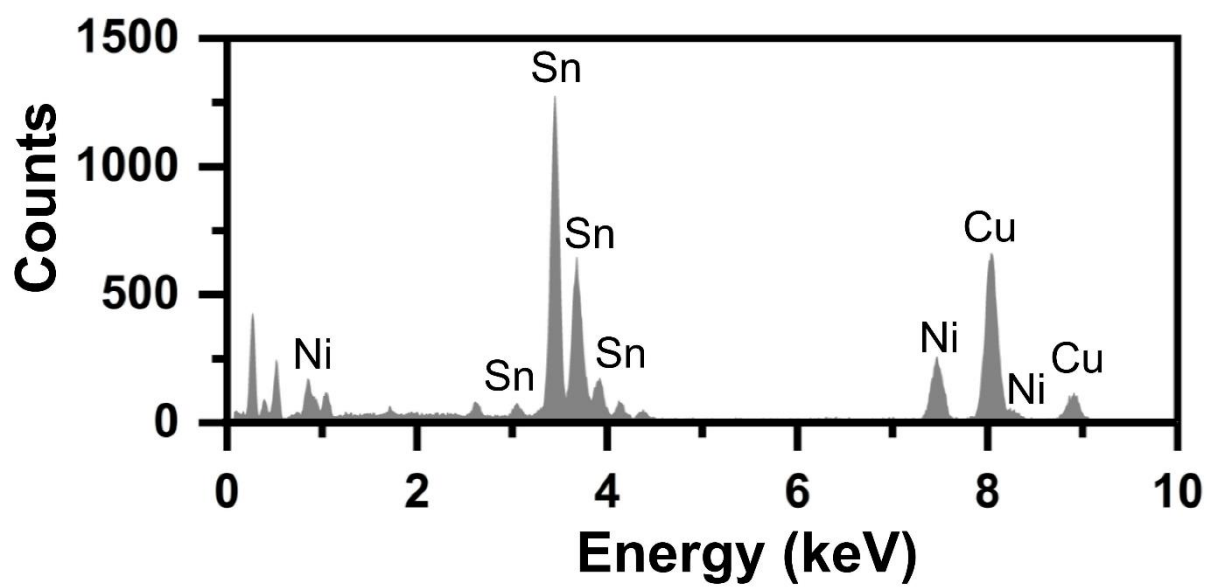

Figure S8. EDX spectrum of NiSn.

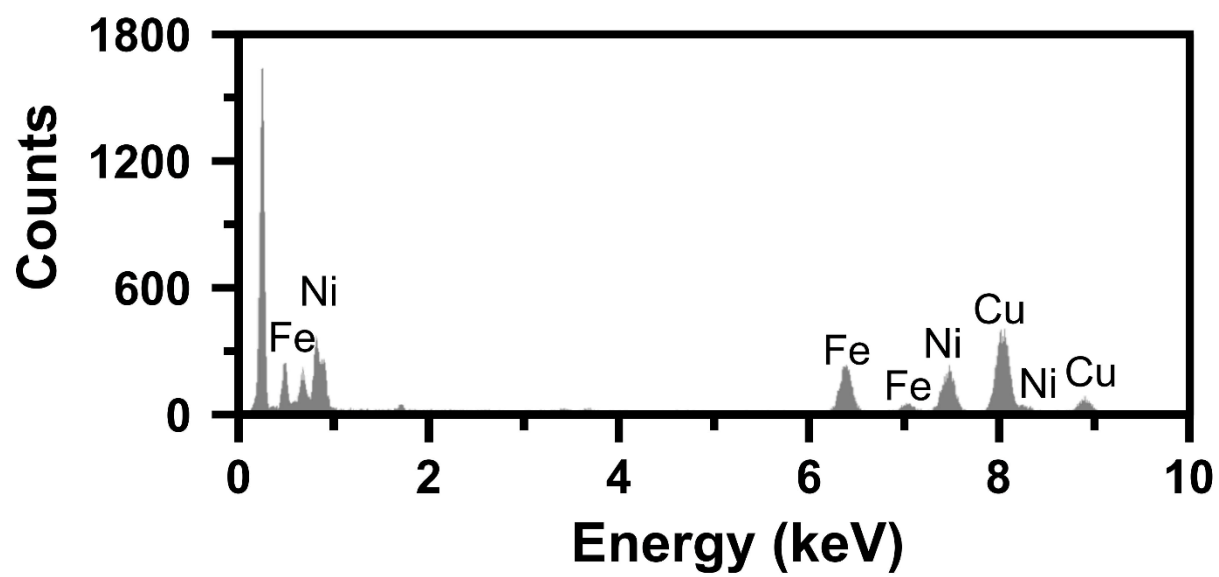

Figure S9. EDX spectrum of NiFe<sub>0.5</sub>.

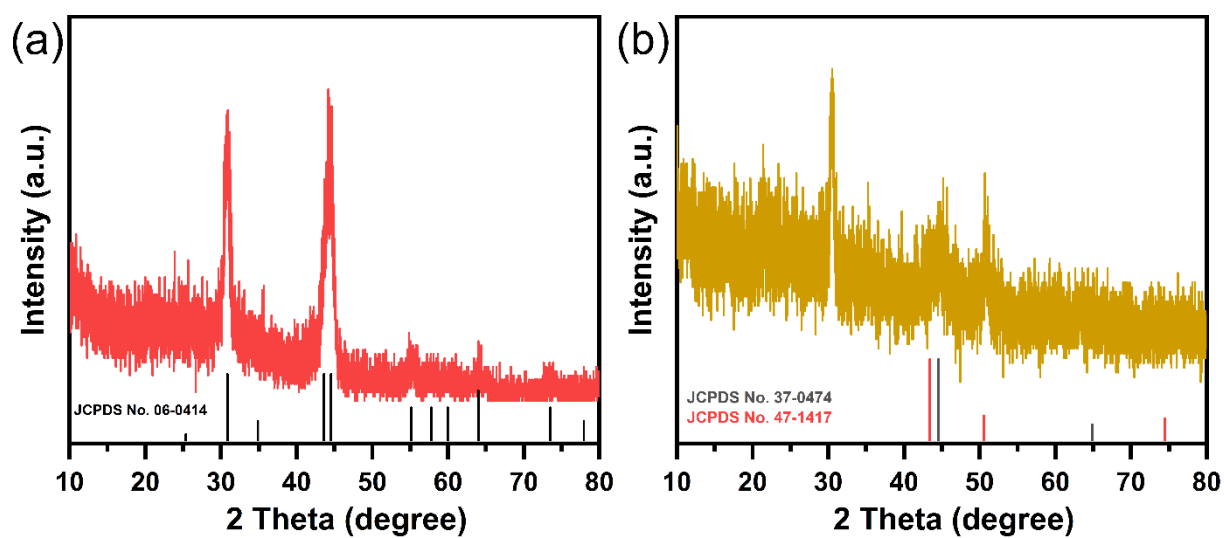

**Figure S10.** XRD patterns of (a) NiSn and (b) NiFe<sub>0.5</sub>.

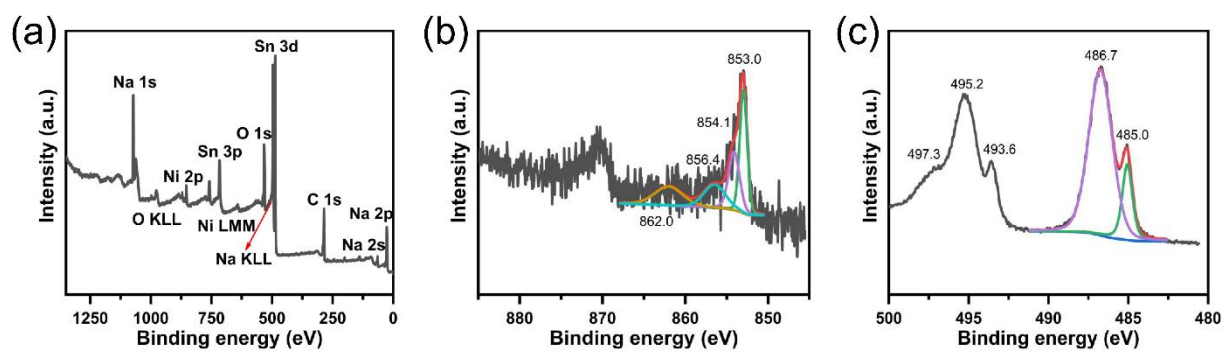

**Figure S11.** (a) XPS survey, (b) Ni 2p and (c) Sn 3d XPS spectra of NiSn.

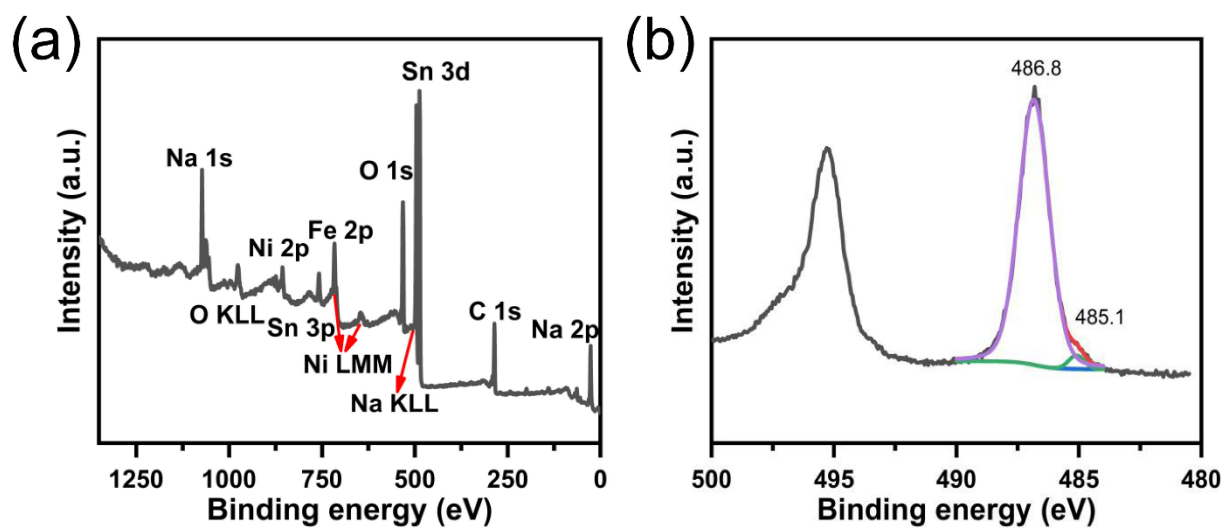

**Figure S12.** (a) XPS survey, (b) Sn 3d XPS spectrum of  $\text{NiFe}_{0.5}\text{Sn}$ .

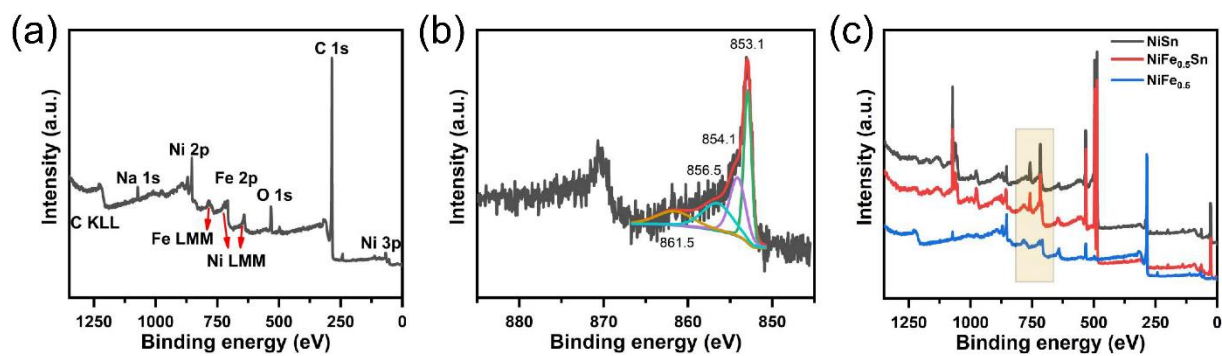

**Figure S13.** (a) XPS survey, (b) Ni 2p XPS spectrum of NiFe<sub>0.5</sub>, (c) XPS surveys of NiSn, NiFe<sub>0.5</sub>Sn and NiFe<sub>0.5</sub>.

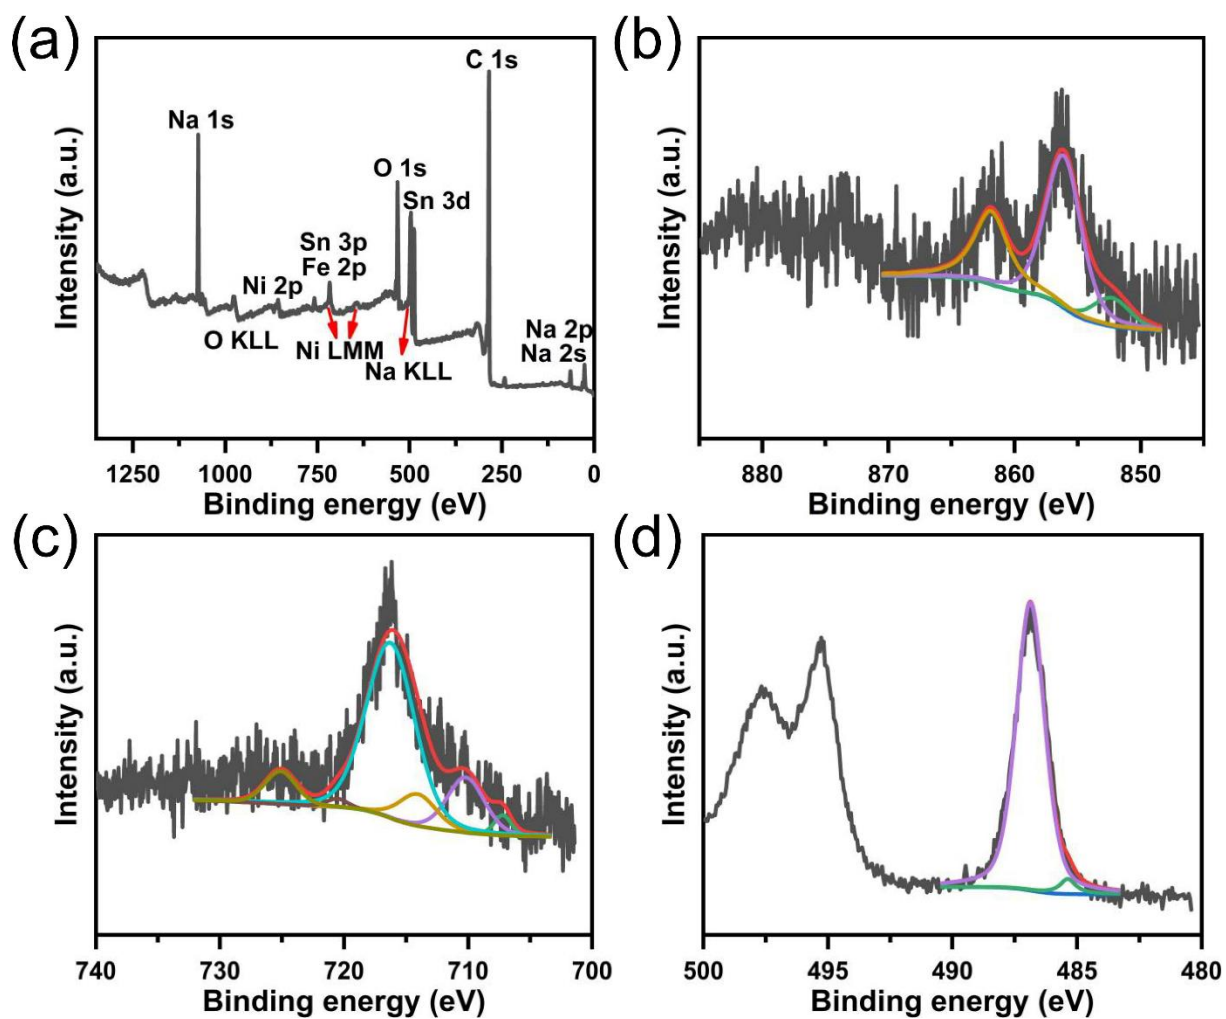

**Figure S14.** (a) XPS survey, (b) Ni 2p, (c) Fe 2p and (d) Sn 3d XPS spectra of NiFe<sub>0.1</sub>Sn.



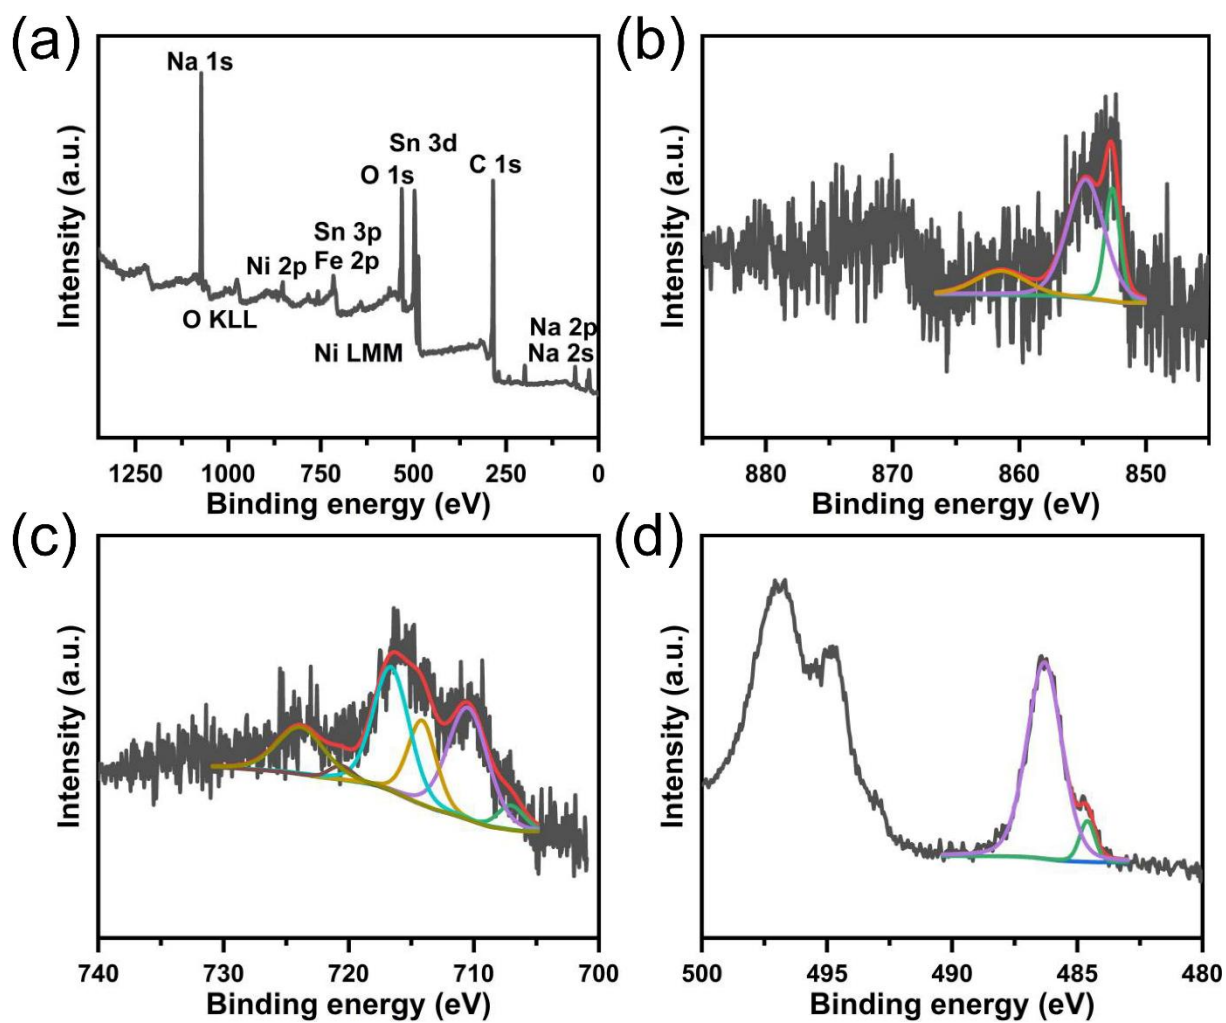

**Figure S15.** (a) XPS survey, (b) Ni 2p, (c) Fe 2p and (d) Sn 3d XPS spectra of NiFe<sub>1</sub>Sn.

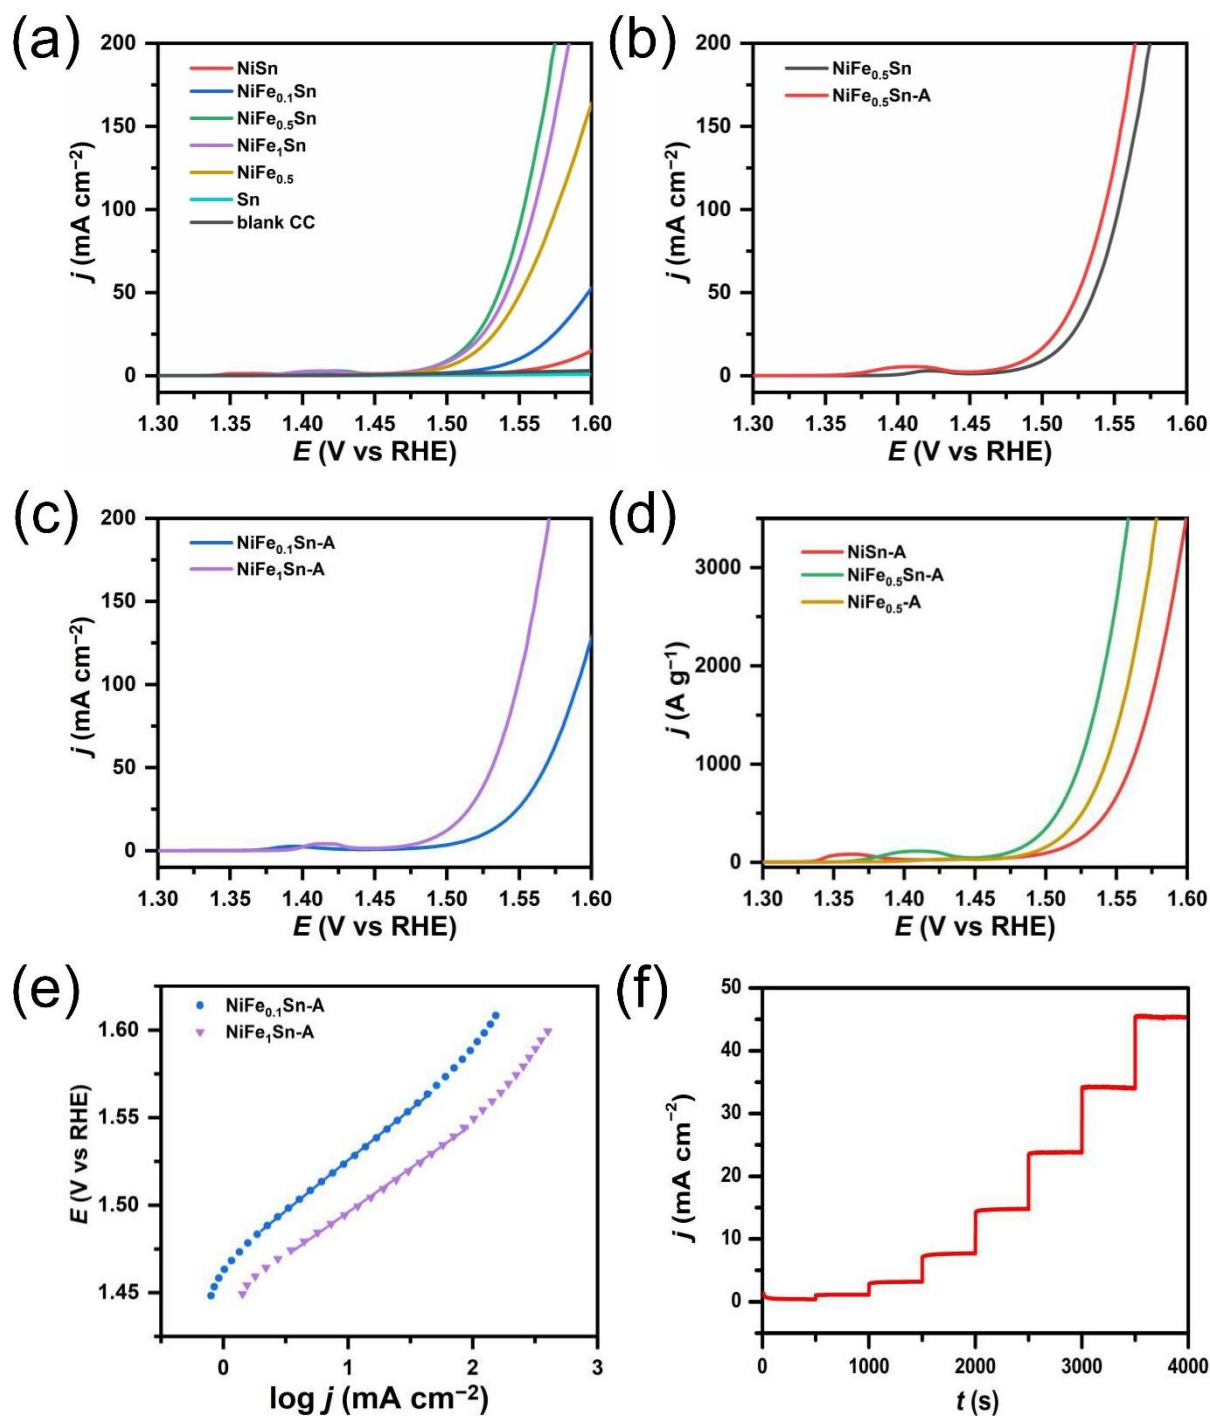

**Figure S16.** Polarization curves of (a) NiSn, NiFe<sub>x</sub>Sn, NiFe<sub>0.5</sub>, Sn and blank CC, (b) NiFe<sub>0.5</sub>Sn and NiFe<sub>0.5</sub>Sn-A, (c) NiFe<sub>0.1</sub>Sn-A and NiFe<sub>1</sub>Sn-A, (d) comparison of mass activity of NiSn-A, NiFe<sub>0.5</sub>Sn-A and NiFe<sub>0.5</sub>-A, (e) Tafel plots of NiFe<sub>0.1</sub>Sn-A and NiFe<sub>1</sub>Sn-A, (f) multipotential steps of NiFe<sub>0.5</sub>Sn-A from 1.47 V to 1.61 V without iR compensation.

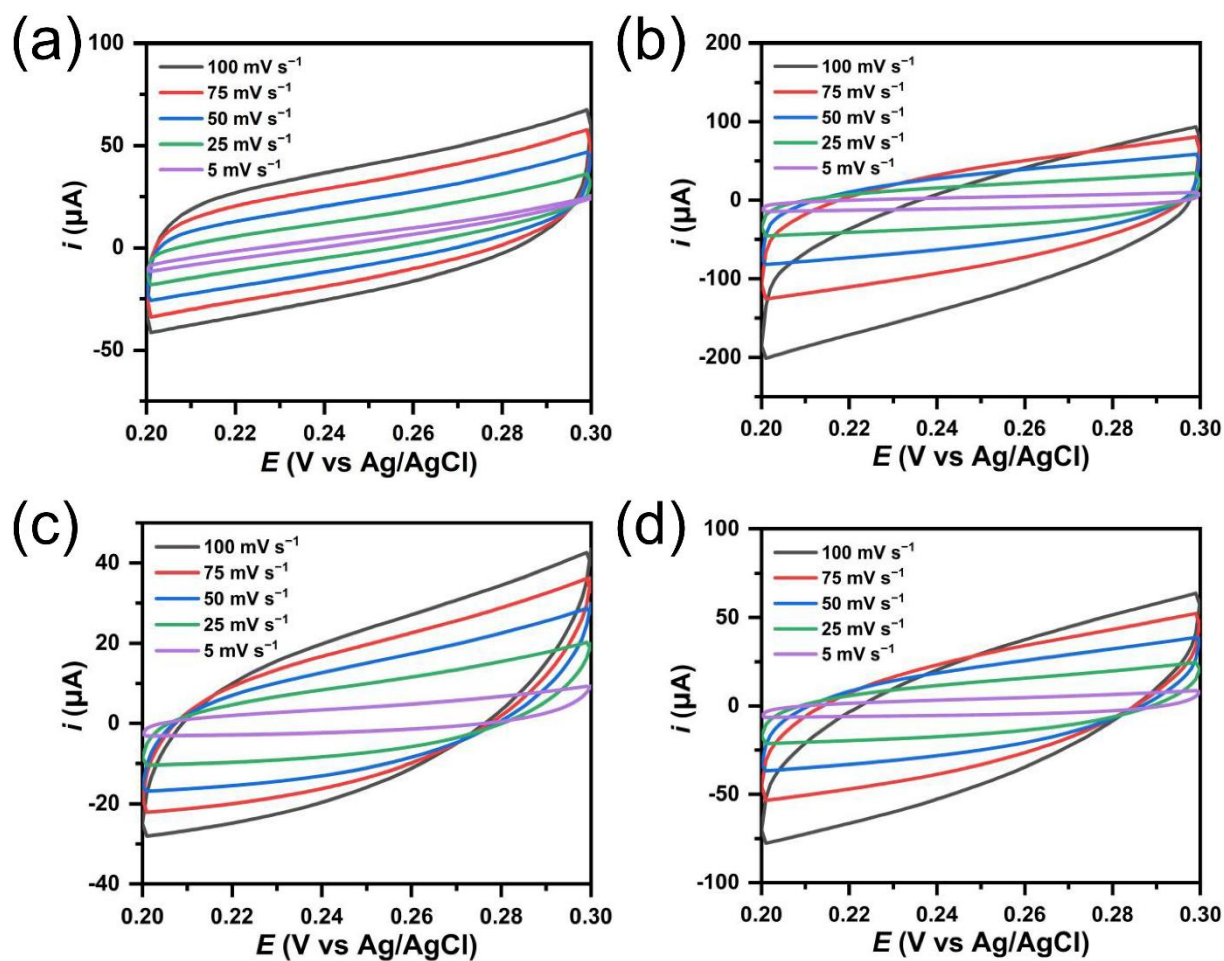

**Figure S17.** CV curves (a, c) before and (b, d) after 2-h anodization of  $\text{NiFe}_{0.5}\text{Sn}$  and  $\text{NiFe}_{0.5}$ .

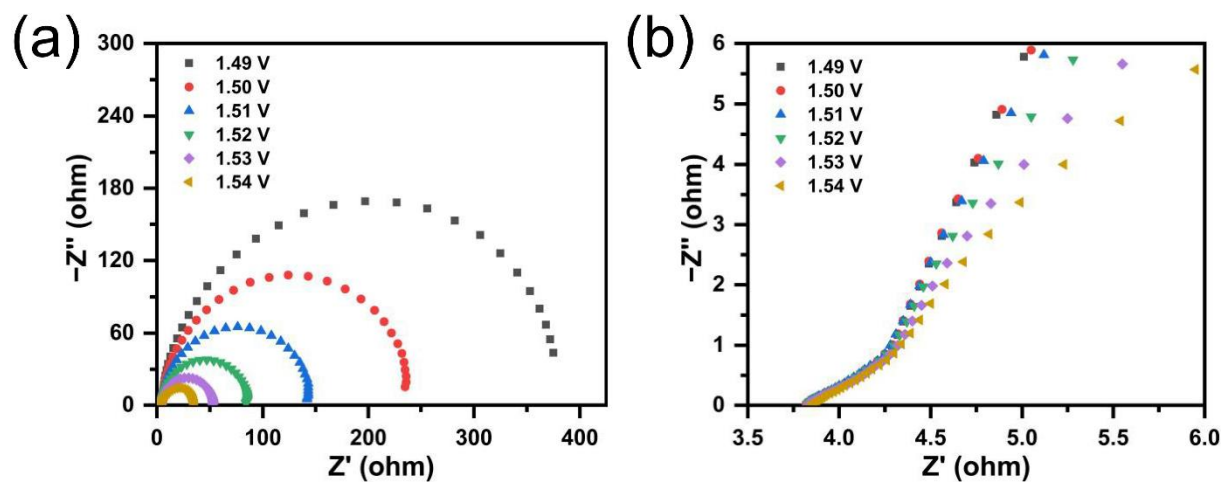

**Figure S18.** (a) Nyquist plots of NiSn-A at different potentials and (b) the corresponding enlarged views.

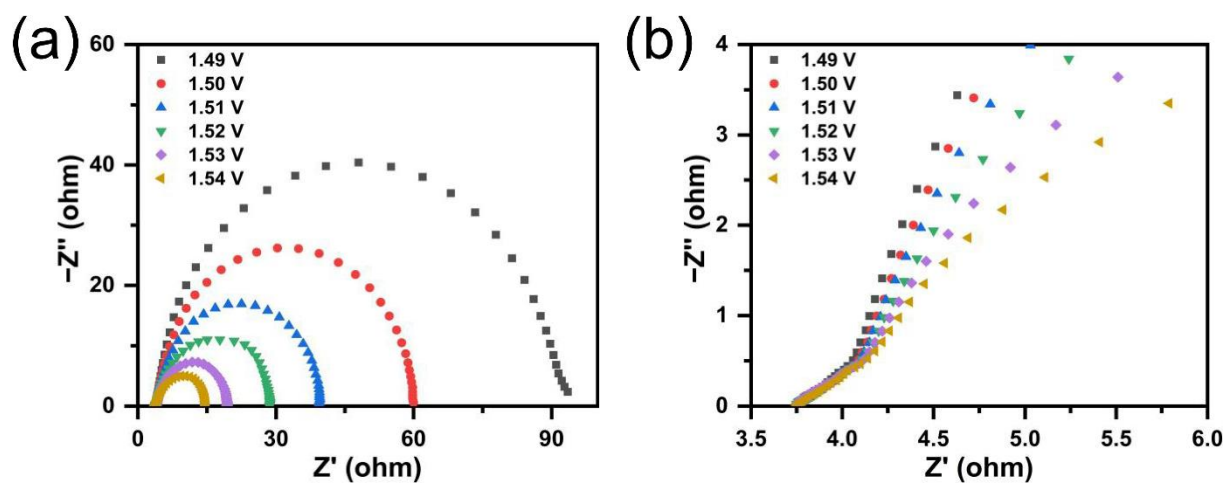

**Figure S19.** (a) Nyquist plots of NiFe<sub>0.5</sub>Sn-A at different potentials and (b) the corresponding enlarged views.

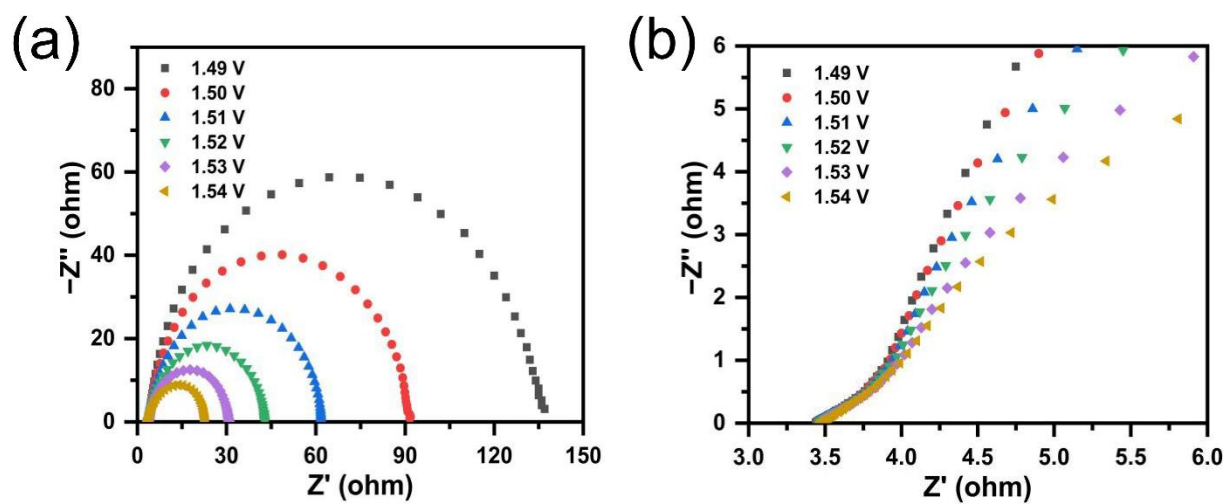

**Figure S20.** (a) Nyquist plots of NiFe<sub>0.5</sub>-A at different potentials and (b) the corresponding enlarged views.

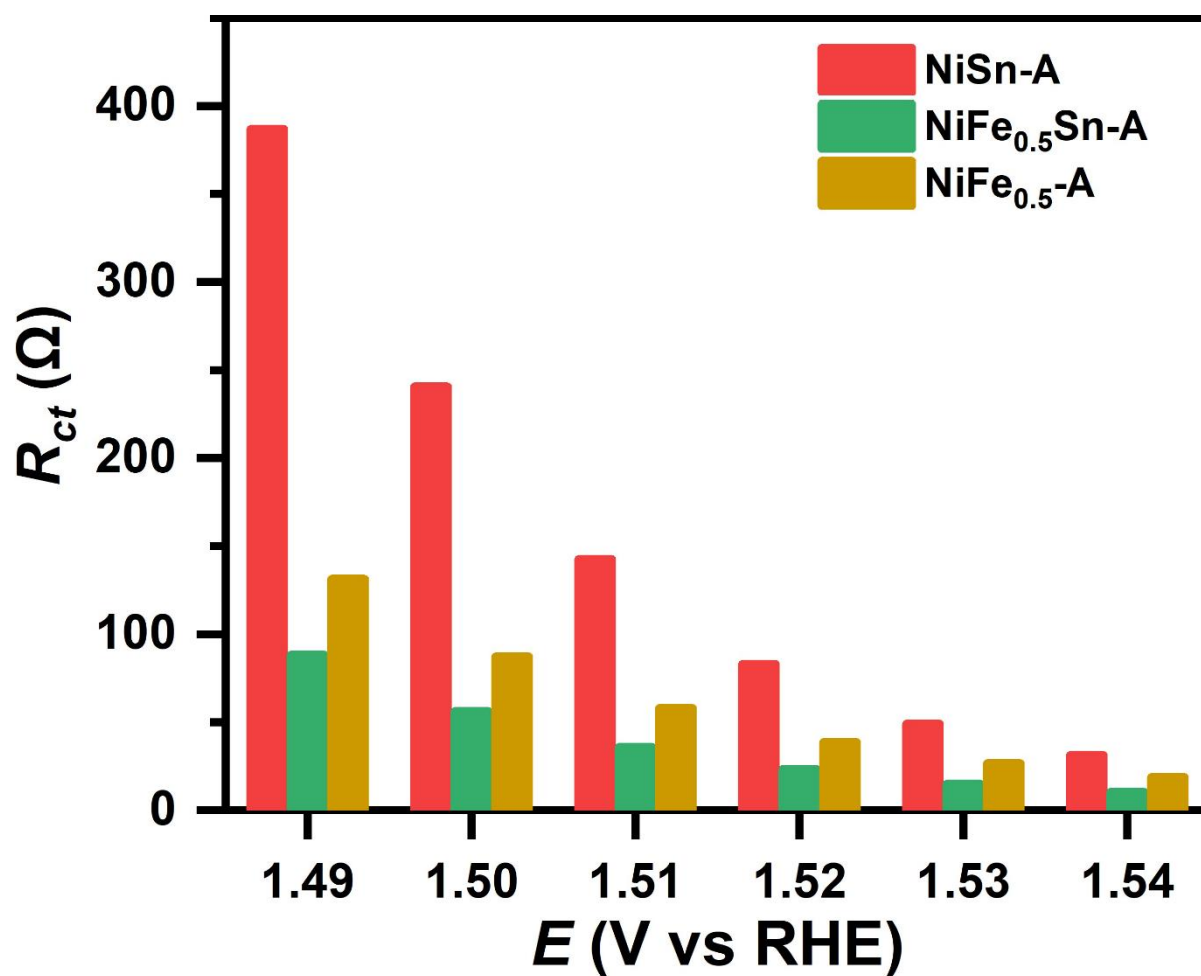

**Figure S21.**  $R_{ct}$  values of NiSn-A, NiFe<sub>0.5</sub>Sn-A and NiFe<sub>0.5</sub>-A at different potentials.

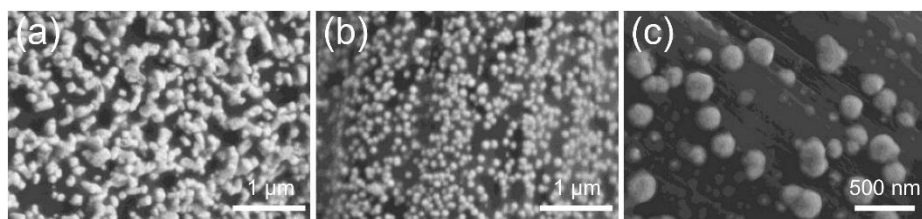

**Figure S22.** SEM images of NiSn-A, NiFe<sub>0.5</sub>Sn-A and NiFe<sub>0.5</sub>-A.



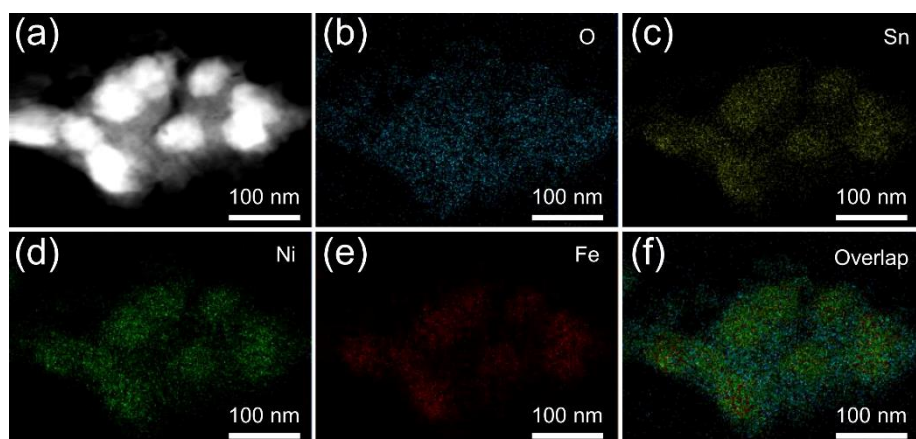

**Figure S23.** TEM elemental mapping of NiFe<sub>0.5</sub>Sn-A.

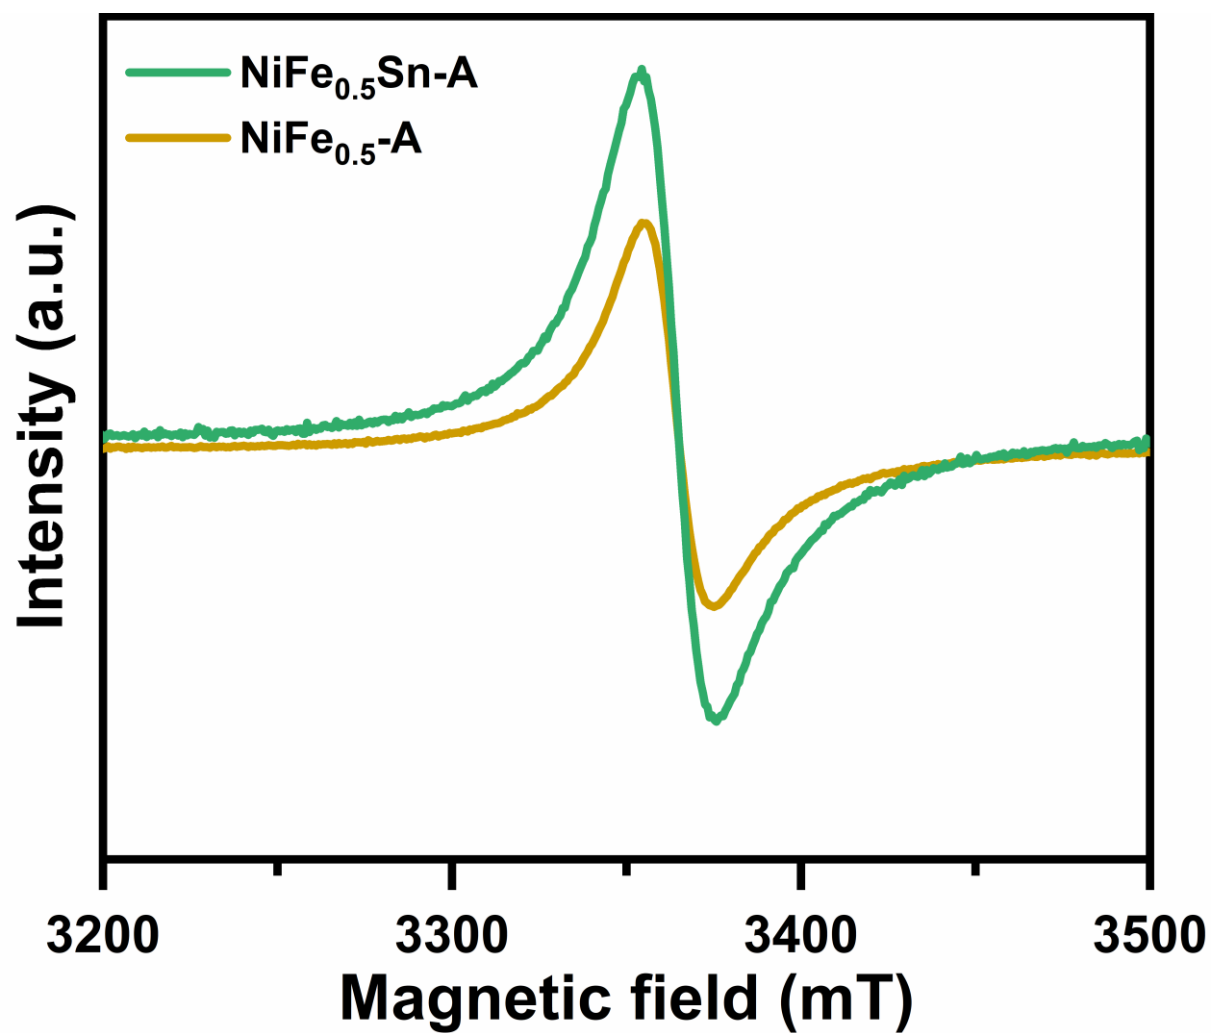

**Figure S24.** X-band EPR spectra of NiFe<sub>0.5</sub>Sn-A and NiFe<sub>0.5</sub>-A acquired at 100 K (microwave frequency = 9.43 GHz).

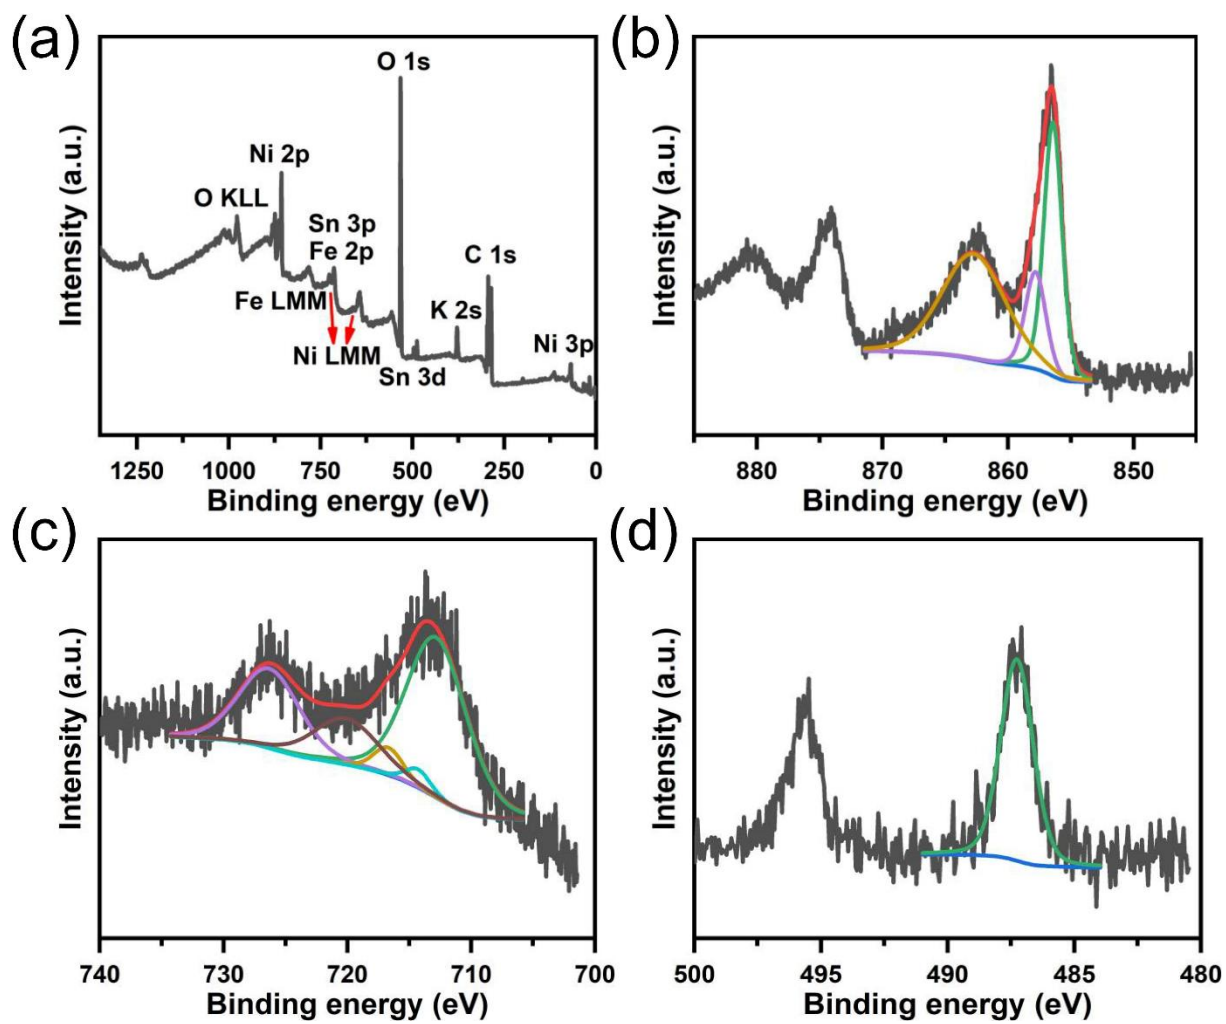

**Figure S25.** (a) XPS survey, (b) Ni 2p, (c) Fe 2p and (d) Sn 3d XPS spectra of NiFe<sub>0.5</sub>Sn-A.

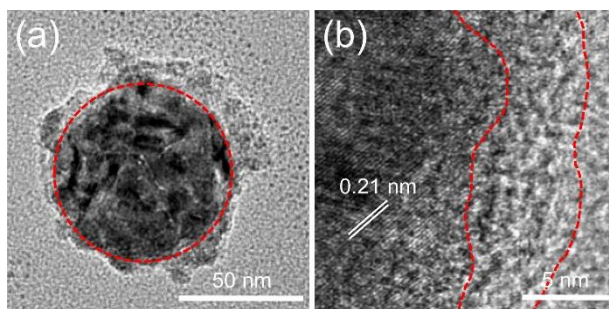

**Figure S26.** (a) TEM and (b) HRTEM images of NiFe<sub>0.5</sub>-A.

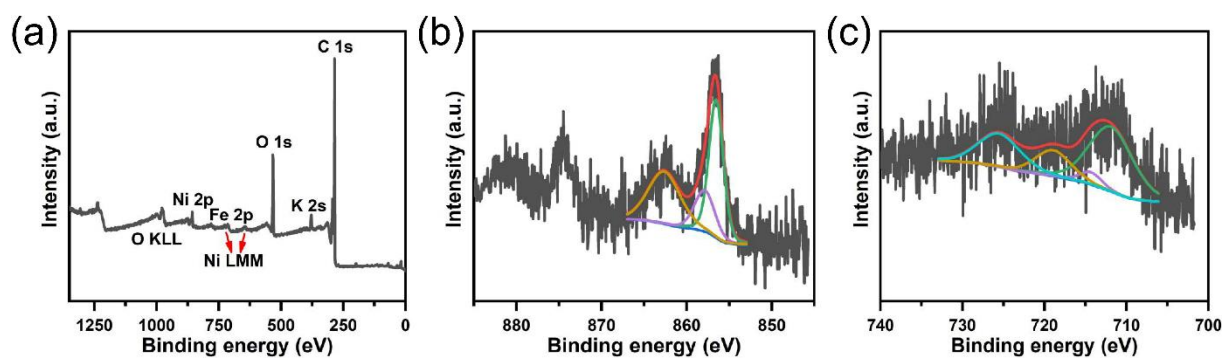

**Figure S27.** (a) XPS survey, (b) Ni 2p and (c) Fe 2p XPS spectra of NiFe<sub>0.5</sub>-A.

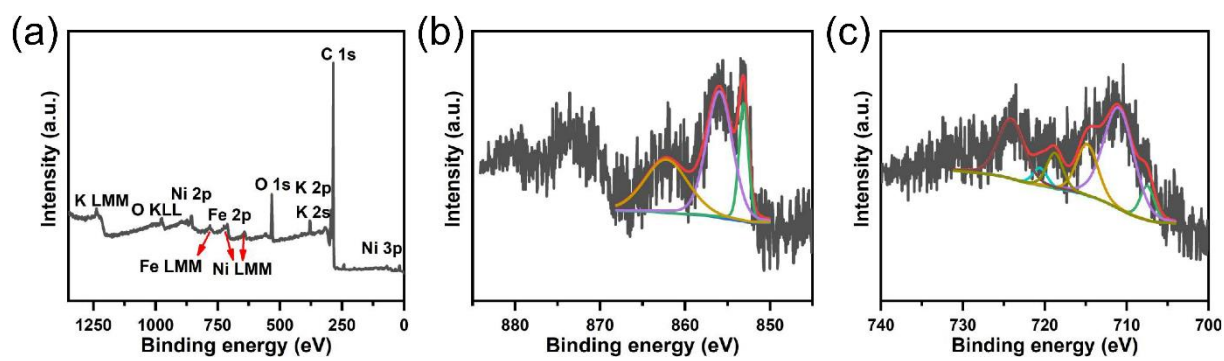

**Figure S28.** (a) XPS survey, (b) Ni 2p and (c) Fe 2p XPS spectra of NiFe<sub>0.5</sub>-A after Ar<sup>+</sup> ion etching.

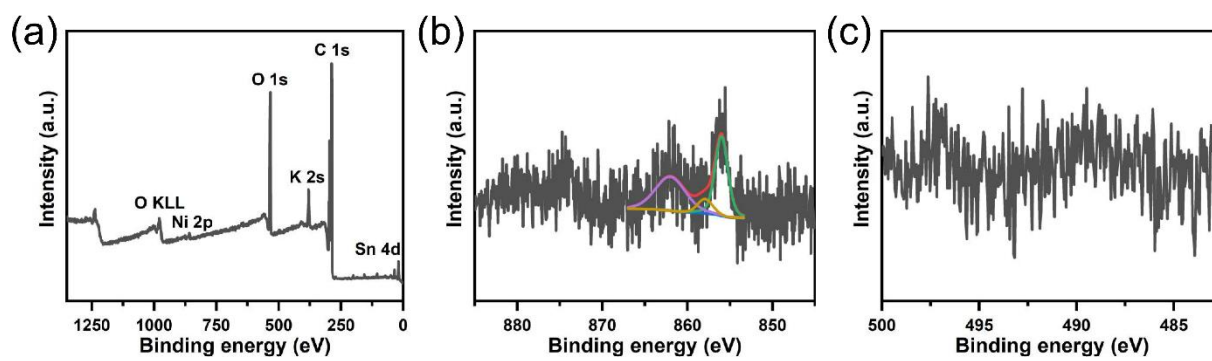

**Figure S29.** (a) XPS survey, (b) Ni 2p and (c) Sn 3d XPS spectra of NiSn-A.

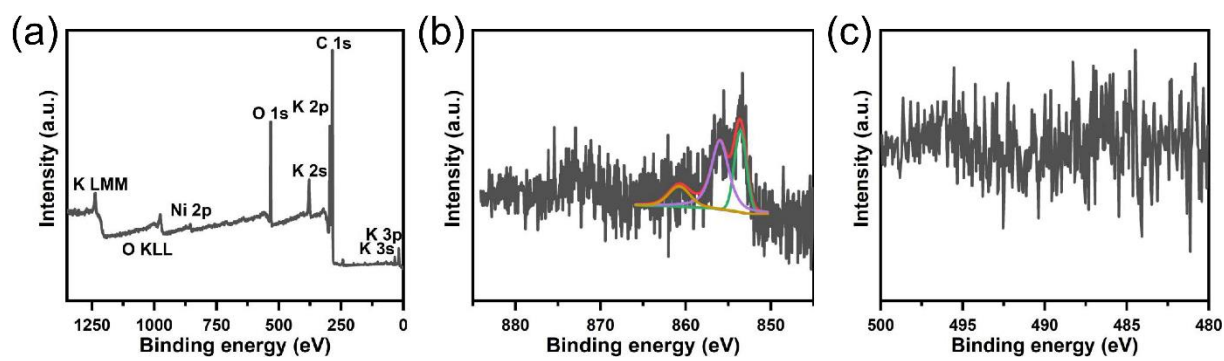

**Figure S30.** (a) XPS survey, (b) Ni 2p and (c) Sn 3d XPS spectra of NiSn-A after Ar<sup>+</sup> ion etching.



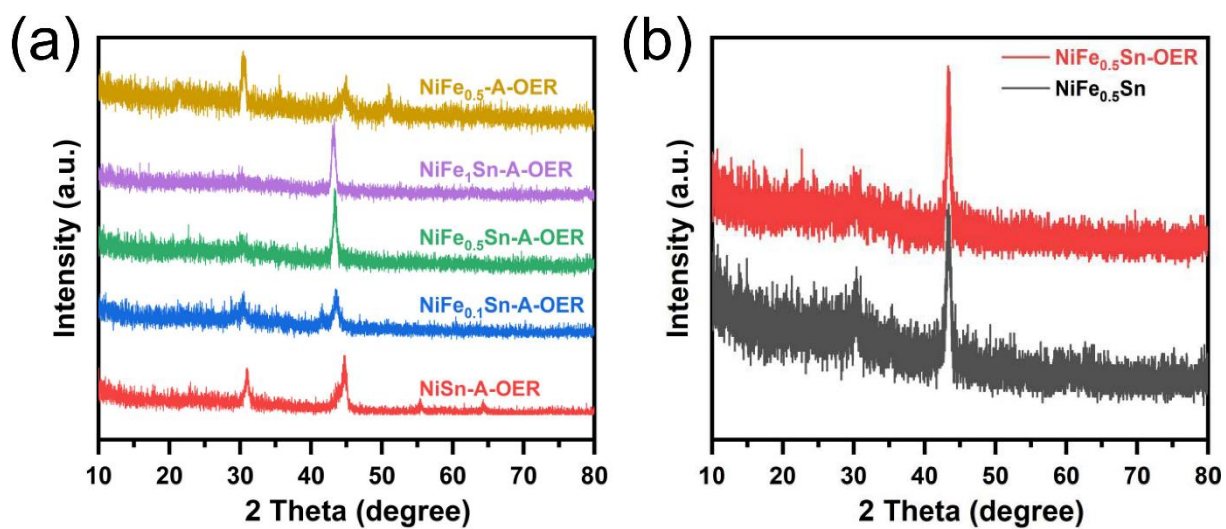

**Figure S31.** (a) XRD patterns of NiSn-A, NiFe<sub>x</sub>Sn-A, NiFe<sub>0.5</sub>-A after the 40000-s OER durability test, (b) the comparison of XRD patterns of NiFe<sub>0.5</sub>Sn and NiFe<sub>0.5</sub>Sn-A after the 40000-s OER durability test.

**Table S1.** Comparison of OER performance in alkaline media for NiFe<sub>0.5</sub>Sn-A with other OER electrocatalysts.

| Catalyst                                                              | Loading (mg cm <sup>-2</sup> ) | Tafel (mV dec <sup>-1</sup> ) | Onset overpotential @ 2.5 mA cm <sup>-2</sup> (mV) | $\eta$ @ 10 mA cm <sup>-2</sup> (mV) | Ref.                                                |
|-----------------------------------------------------------------------|--------------------------------|-------------------------------|----------------------------------------------------|--------------------------------------|-----------------------------------------------------|
| NiFe <sub>0.5</sub> Sn-A                                              | 0.048                          | 50                            | 227                                                | 260                                  | This work                                           |
| NiSn-A                                                                | 0.019                          | 59                            | 279                                                | 310                                  | This work                                           |
| NiFe <sub>0.5</sub> -A                                                | 0.029                          | 52.7                          | 257                                                | 287                                  | This work                                           |
| Exfoliated NiFe LDH                                                   | 0.07                           | 40                            | 275                                                | 302                                  | <i>Nature Commun.</i> <b>2014</b> , 5, 4477         |
| 15 at% Fe holey film                                                  | N/A                            | 38                            | ~250                                               | 295                                  | <i>ACS Catal.</i> <b>2017</b> , 7, 8406             |
| Ni <sub>65</sub> +Fe <sub>35</sub> (O <sub>x</sub> H <sub>y</sub> )   | 0.025                          | 37                            | ~270                                               | 298                                  | <i>Chem. Commun.</i> <b>2019</b> , 55, 818          |
| Na <sub>0.08</sub> Ni <sub>0.9</sub> Fe <sub>0.1</sub> O <sub>2</sub> | 0.13                           | 40                            | ~230                                               | 260                                  | <i>Energy Environ. Sci.</i> <b>2017</b> , 10, 121   |
| NiFeMn-LDH                                                            | 0.2                            | 47                            | ~230                                               | 262                                  | <i>Chem. Commun.</i> <b>2016</b> , 52, 908          |
| NiV-LDH                                                               | 0.143                          | 50                            | 275                                                | 320                                  | <i>Nat. Commun.</i> <b>2016</b> , 7, 11981          |
| CF-ONFs-O                                                             | 2.33                           | 69.9                          | N/A                                                | 310                                  | <i>Adv. Funct. Mater.</i> <b>2018</b> , 28, 1704177 |
| Ni <sub>0.9</sub> Fe <sub>0.1</sub> /NC                               | 0.2                            | 45                            | 300                                                | 330                                  | <i>ACS Catal.</i> <b>2016</b> , 6, 580              |
| nNiFe LDH/NGF                                                         | 0.25                           | 45                            | 290                                                | 337                                  | <i>Adv. Mater.</i> <b>2015</b> , 27, 4516           |
| hcp-NiFe@NC                                                           | 0.25                           | 41                            | N/A                                                | 226                                  | <i>Angew. Chem. Int. Ed.</i> <b>2019</b> , 58, 6099 |
| Ni <sub>0.75</sub> Fe <sub>0.25</sub> (OH) <sub>x</sub>               | 0.35                           | 68                            | 260                                                | 310                                  | <i>Chem. Commun.</i> <b>2019</b> , 55, 1044         |

**Table S2.** The loading of Ni and Fe in NiSn, NiFe<sub>0.5</sub>Sn and NiFe<sub>0.5</sub> as determined by ICP-OES.

| <b>Catalyst</b>        | <b>Ni loading (μg)</b> | <b>Fe loading (μg)</b> |
|------------------------|------------------------|------------------------|
| NiSn                   | 4.80                   | 0                      |
| NiFe <sub>0.5</sub> Sn | 7.89                   | 4.07                   |
| NiFe <sub>0.5</sub>    | 3.71                   | 3.61                   |
